# Supplementary material for: Food-related worry and food bank use during the COVID-19 pandemic in Canada: results from a nationally representative multi-round study
Source: Springer Nature journal article supplement (doi:10.1186/s12889-023-16602-x), 2023-09-05
Supplement: MOESM1 [file 26008874]

**Assessing the mental health impacts of COVID-19: A national survey study Introduction and Privacy Information Page**  
**Final Questionnaire: Click or tap to enter a date. Version: 1.0**

**SURVEY DETAILS**

**Survey Respondent Details:**

Quote Code: Add quote code  
 Languages: English

Device Type: Desktop + Mobile  
 Target LOI: Add length in minutes

**Standard Demographics:**

Below are the standard demographics that are automatically included in projects using Maru/Blue sample. Click on each demographic to preview the question text, answer options and standard rollups where available:

[Age \(incl. Age Rollup\)](#)

[Gender](#)

[Regions](#)

- CDA: Postal Code, Province, SAC
- US: Zipcode, Division, 4 Regions, DMA, FIPS
- UK: Post Code, 14 Region Rollup

[Education](#)

[Employment](#)

[Marital Status](#)

[Ethnicity \(incl. Hispanic/Latino in US\)](#)

[Household Income](#)

[Children in Household](#)

Below are the data analysis requirements pertaining to the standard demographic questions above (i.e. if an age roll-up with different breaks than the standard is required, please outline as below):

| QUESTION      | REQUIREMENTS                                                                      |
|---------------|-----------------------------------------------------------------------------------|
| Age           | 18-24 years, 25-34 years, 35-44 years, 45-54 years, 55-64 years, 65-74 years, 75+ |
| Choose a demo |                                                                                   |
| Choose a demo |                                                                                   |

**Key Questions:**

Below are the key/core questions that are critical to this research and will be the focus of reporting and analysis:

- Q#
- Q#
- Q#

**Study Timelines:**

Below are the study milestones and associated timelines:

| MILESTONE                             | DATE                                                           |
|---------------------------------------|----------------------------------------------------------------|
| <b>Draft Questionnaire Delivered:</b> | Click or tap to enter a date.                                  |
| <b>Final Questionnaire Approved:</b>  | Click or tap to enter a date.                                  |
| <b>Programming + QA:</b>              | Click or tap to enter a date. to Click or tap to enter a date. |
| <b>Fielding:</b>                      | Click or tap to enter a date. to Click or tap to enter a date. |

**Deliverables:**  Click or tap to enter a date.

**Survey Quotas:**

Below are the entry and in-study quota details:

| QUOTA       | CRITERIA          | AMOUNT | HARD / SOFT | MIN / MAX |
|-------------|-------------------|--------|-------------|-----------|
| Entry Quota | Total Respondents |        |             |           |
|             |                   |        |             |           |
|             |                   |        |             |           |
|             |                   |        |             |           |

**Termination Text:**

*If your study is using IC or Client Supplied sample, please specify termination text below or delete this section if not applicable.*

| TERMINATION TYPE | TEXT | REDIRECT (if applicable) |
|------------------|------|--------------------------|
| Disqualification |      |                          |
| Over Quota       |      |                          |
| Complete         |      |                          |

**SECTION 1: PREAMBLE AND CONSENT**

[QUESTION TYPE: single choice LAYOUT: default (kato)]  
[QCONSENT] [REQUIRED]  
Base: Total

Thank you for your interest in the COVID-19 Mental Health Survey Study. Completing this anonymous survey provides us with information that can help community organizations, and public health leaders understand and respond to the mental health impacts of the pandemic. The information you give will be kept private and confidential.

The survey will take about 10 minutes to complete.

If you agree to take part in the survey, you will be asked about your feelings, attitudes, mental and general health.

This survey is voluntary and you may withdraw at any time by closing the survey window. This will exit the survey and delete all responses you have entered. After clicking the "submit survey" button at the end of the survey, you will be unable to withdraw your responses.

If you would like to participate in the survey, please read the following privacy statement and complete the consent section below.

#### Privacy Statement

This information is collected by the COVID-19 Mental Health Research Team, led by Dr. Emily Jenkins at the University of British Columbia. Survey data will be used to understand the mental health impacts of COVID-19 on those living in Canada during the study period.

Should you have any questions, or would like more information, please contact:  
Dr. Emily Jenkins (Principal Investigator) 604-822-4980 or emily.jenkins@ubc.ca

Only the research team will have access to the survey responses; the anonymized responses will be pooled and stored in a password protected database on a Canadian-hosted server. All information will remain in Canada. Electronic files will be password protected and erased using appropriate file deletion software. The findings of the research may be published in open access journals, which may allow other researchers to access the anonymous survey responses. Your name will never be associated with the data and will not appear in any publications.

#### Ethics Review

If you have any concerns or complaints about your rights as a research participant and/or your experiences while participating in this study, contact the Research Participant Complaint Line in the UBC Office of Research Ethics at 604-822-8598 or if long distance e-mail RSIL@ors.ubc.ca or call toll free 1-877-822-8598.

Checking the box below indicates that you have read and understand the above information.

#### [ANSWERS] [ANCHOR]

I have read and agree to the terms of the above Privacy Statement, and consent to participate in this survey.

I do not wish to continue [TERMINATE]

TAB NOTE:  
Detail Table Requirements

[QUESTION TYPE: text instruction]

[Q\_INSTRUCTION] [REQUIRED]

Base: Total

The 2019 novel coronavirus (2019-nCoV), otherwise known as COVID-19, is an infectious disease that has resulted in a global pandemic. Throughout this questionnaire, we will refer to the disease as COVID-19.

For the following questions, please think about yourself, members of your household, or other family members who have been affected by the COVID-19 pandemic.

[QUESTION TYPE: open end LAYOUT: text field (single line) narrowtextbox - numeric (kato)]

[QS2] [REQUIRED]

Base: Total

What's your age?

**TERMINATE IF NOT 18+ & Show numbers in drop down 1 to 100**

TAB NOTE:

Breakdown: 18-24 years, 25-34 years, 35-44 years, 45-54 years, 55-64 years, 65-74 years, 75+

[QUESTION TYPE: single choice LAYOUT: default (kato)]

[QS3] [REQUIRED]

Base: Total

In which province or territory do you currently live?

[ANSWERS] [ANCHOR]

Alberta  
British Columbia  
Manitoba  
New Brunswick  
Newfoundland and Labrador  
Northwest Territories  
Nova Scotia  
Nunavut  
Ontario  
Prince Edward Island  
Quebec  
Saskatchewan  
Yukon

TAB NOTE:

Detail Table Requirements

[QUESTION TYPE: single choice LAYOUT: default (kato)]

[QS4] [REQUIRED]

Base: Total

## maru/matchbox

Do you live in an urban or rural environment?

**[ANSWERS] [ANCHOR]**

Urban  
Suburban  
Rural

TAB NOTE:

[Detail Table Requirements](#)

**[QUESTION TYPE:** single choice **LAYOUT:** default (kato)]

**[QS5] [REQUIRED]**

**Base: Total**

Please select the highest level of education you have completed.

**[ANSWERS] [ANCHOR]**

Elementary/grade school  
Some high school  
High school graduate  
Some college / technical school  
Completed college / technical school  
Some university  
University undergraduate degree  
Some post-graduate school  
Post-graduate degree

TAB NOTE:

[Detail Table Requirements](#)

**[QUESTION TYPE:** single choice **LAYOUT:** default (kato)]

**[QS6] [REQUIRED]**

**Base: Total**

What is your marital status?

**[ANSWERS] [ANCHOR]**

Single, never married  
Common law  
Civil partnership  
Married  
Separated  
Divorced  
Widowed  
Engaged

TAB NOTE:

[Detail Table Requirements](#)

[QUESTION TYPE: single choice LAYOUT: default (kato)]

[QS7] [REQUIRED]

Base: Total

Please indicate the category which best describes your total household annual income before taxes.

[ANSWERS] [ANCHOR]

- Less than \$25,000
- \$25,000 to less than \$35,000
- \$35,000 to less than \$50,000
- \$50,000 to less than \$75,000
- \$75,000 to less than \$100,000
- \$100,000 to less than \$125,000
- \$125,000 to less than \$150,000
- \$150,000 to less than \$250,000
- \$250,000 to less than \$500,000
- \$500,000 or more
- Don't know/prefer not to say

TAB NOTE:

Detail Table Requirements

SECTION 2: COVID QUESTIONS

[QUESTION TYPE: multi choice LAYOUT: default (kato)]

[Q\_EMPLOYMENTSTATUS] [REQUIRED]

Base: Total

The COVID-19 pandemic has had substantial impacts on employment. Which of the following best describes your current employment status? (Please select all that apply)

[ANSWERS] [ANCHOR]

- Working full time (30 or more hours per week)
- Working part time (fewer than 30 hours per week)
- Full time student (e.g. school, college, university, job training)
- Part time student (e.g. school, college, university, job training)
- Not working (e.g. parental leave, disability, medical leave, etc.)
- Not working due to personal preference because of COVID-19
- Volunteer (unpaid)
- Retired
- Unemployed (due to COVID-19)
- Unemployed (prior to COVID-19)
- Underemployed (loss of hours due to COVID)

Other  
Prefer not to answer [EXCLUSIVE]

TAB NOTE:  
Detail Table Requirements

[QUESTION TYPE: single choice LAYOUT: default (kato)]  
[Q\_ESSENTIALSERVICE] [REQUIRED]  
Base: IF CODE 1-2 in Q\_EMPLOYMENTSTATUS

The job that I am currently working in has been deemed as an essential service during the COVID-19 pandemic (i.e., your position is identified by your provincial government as an essential service and you have continued to work in your role throughout the pandemic).

[ANSWERS] [ANCHOR]  
Yes  
No  
Prefer not to answer

TAB NOTE:  
Detail Table Requirements

[QUESTION TYPE: single choice LAYOUT: default (kato)]  
[Q\_EMPLOYMENTTYPE] [REQUIRED]  
Base: [CODE 1-2 EMPLOYMENT STATUS (working full or part time)]

Please select the category that BEST describes your professional role:

[ANSWERS] [RANDOMIZE]  
Health and health services  
Law enforcement, public safety, first responder  
Vulnerable population service provider (e.g., community outreach, substance use and addiction services)  
Education (K-12) [GROUP EDUCATION]  
Education (post-secondary) [GROUP EDUCATION]  
Education (early childhood) [GROUP EDUCATION]  
Food and agriculture service provider (farming, food processing, grocery, hardware)  
Transportation  
Industry and manufacturing  
Communications and information technology  
Financial institutions  
Retail  
Other [ANCHOR]  
Prefer not to answer [ANCHOR]

TAB NOTE:  
Detail Table Requirements

[QUESTION TYPE: single choice LAYOUT: default (kato)]

[QSelfMentalhealth] [REQUIRED]

Base: Total

In general, would you say your mental health is:

[ANSWERS] [ANCHOR]

- Excellent
- Very good
- Good
- Fair
- Poor

TAB NOTE:

Detail Table Requirements

[QUESTION TYPE: single choice LAYOUT: default (kato)]

[Q\_Mentalhealth] [REQUIRED]

Base: Total

Compared to before the COVID-19 pandemic and related restrictions in Canada, how would you say your mental health is **now**?

[ANSWERS] [ANCHOR]

- Significantly better now
- Slightly better now
- About the same
- Slightly worse now
- Significantly worse now
- Prefer not to answer

TAB NOTE:

Detail Table Requirements

[QUESTION TYPE: text instruction]

[Q\_K6] [REQUIRED] [STRAIGHTLINE CHECK: NO]

Base: Total

The following questions ask about how you have been feeling during the past 30 days. For each question, please indicate how often you have this feeling.

[QUESTION TYPE: single choice LAYOUT: default (kato)]



[Q1a] [REQUIRED]

Base: Total

During the past 30 days, how often did you feel **nervous**?

[ANSWERS] [ANCHOR]

- All of the time
- Most of the time
- Some of the time
- A little of the time
- None of the time

TAB NOTE:

[Detail Table Requirements](#)

[QUESTION TYPE: single choice LAYOUT: default (kato)]

[Q1b] [REQUIRED]

Base: Total

During the past 30 days, how often did you feel **hopeless**?

[ANSWERS] [ANCHOR]

- All of the time
- Most of the time
- Some of the time
- A little of the time
- None of the time

[QUESTION TYPE: single choice LAYOUT: default (kato)]

[Q1c] [REQUIRED]

Base: Total

During the past 30 days, how often did you feel **restless or fidgety**?

[ANSWERS] [ANCHOR]

- All of the time
- Most of the time
- Some of the time
- A little of the time
- None of the time

[QUESTION TYPE: single choice LAYOUT: default (kato)]

[Q1d] [REQUIRED]

Base: Total

During the past 30 days, how often did you feel **so depressed that nothing could cheer you up?**

[ANSWERS] [ANCHOR]

- All of the time
- Most of the time
- Some of the time
- A little of the time
- None of the time

[QUESTION TYPE: single choice LAYOUT: default (kato)]

[Q1e] [REQUIRED]

Base: Total

During the past 30 days, how often did you feel **that everything was an effort?**

[ANSWERS] [ANCHOR]

- All of the time
- Most of the time
- Some of the time
- A little of the time
- None of the time

[QUESTION TYPE: single choice LAYOUT: default (kato)]

[Q1f] [REQUIRED]

Base: Total

During the past 30 days, how often did you feel **worthless?**

[ANSWERS] [ANCHOR]

- All of the time
- Most of the time
- Some of the time
- A little of the time
- None of the time

[QUESTION TYPE: multi choice LAYOUT: default (kato)]

[Q\_COVID19disease] [REQUIRED]

Base: Total

Which of the following applies to how you have been affected by COVID-19 at any point during the pandemic?  
(Please select all that apply)

[ANSWERS] [ANCHOR]

- I have been tested for COVID-19 and had a positive result
- I have been tested for COVID-19 for employment/education reasons and had a negative result
- I have been tested for COVID-19 for travel reasons and had a negative result
- I have been tested for COVID-19 because I had symptoms and/or contact with someone who tested positive, and

- had a negative result
- I had symptoms of COVID-19, but was not able to get tested
- Someone else in my household has tested positive for COVID-19
- I am living with residual symptoms ("Long COVID") after having contracted COVID-19
- I am caring for someone with residual symptoms ("Long COVID") after having contracted COVID-19
- A close friend or family member has died from COVID-19
- A close friend or family member has been hospitalized due to COVID-19
- I have been hospitalized due to COVID-19
- None of these [ANCHOR] [EXCLUSIVE]
- Don't know [ANCHOR] [EXCLUSIVE]
- Prefer not to answer [ANCHOR] [EXCLUSIVE]

TAB NOTE:  
Detail Table Requirements

[QUESTION TYPE: multi choice LAYOUT: default (kato)]

[Q\_EMOTIONALRESPONSE] [REQUIRED]

Base: Total

Which of the following emotions have you felt as a result of the COVID-19 pandemic in the **past 2 weeks**?  
(Please select all that apply)

[ANSWERS] [RANDOMIZE]

- Afraid
- Panicked
- Anxious or worried
- Empathetic
- Indifferent
- Hopeful
- Hopeless
- Ashamed
- Guilty
- Lonely or isolated
- Unprepared
- Sad
- Angry
- Stressed
- Bored
- Inspired
- Depressed
- Calm
- Comfortable
- Content
- Secure
- None of these [ANCHOR] [EXCLUSIVE]
- Don't know [ANCHOR] [EXCLUSIVE]
- Prefer not to answer [ANCHOR] [EXCLUSIVE]

TAB NOTE:  
Detail Table Requirements

[QUESTION TYPE: single choice grid LAYOUT: default (kato)]  
[Q\_STRESSORS] [REQUIRED]  
Base: Total

Have you been stressed or worried about any of the following as a result of the COVID-19 pandemic in **the past 2 weeks?** (Please select one option on each row)

[COLUMNS] [ANCHOR]

Yes  
No  
Don't know /Not applicable/ Prefer not to say

[ROWS] [RANDOMIZE]

Financial concerns (e.g. going into debt, ability to pay bills, long-term economic impacts, etc.)  
Being unable to access government benefit payments (e.g., not being eligible for benefits)  
Losing benefits due to reaching benefit limit  
Being in close proximity to unvaccinated family, colleagues or peers  
Losing my job / loss of my job  
Changing work requirements (e.g., return to in-person work environment)  
Having to leave my job due to stress, fatigue, and/or burnout  
Being able to cope with uncertainty (e.g. not knowing what will happen)  
Becoming ill with the virus  
Having no-one to care for me as a result of becoming ill with the virus  
Not being able to care for friends and family as a result of becoming ill with the virus  
The spread of new variants/mutations of the virus  
Being vulnerable because other people are not following public health orders  
Being vulnerable because of an existing medical condition, age, etc.  
Being separated from friends and family  
Having enough food to meet my household's basic needs  
My education or career training being interrupted  
Making my existing mental health problems worse  
Worrying about how the mental health of my child(ren) will be affected by the pandemic  
My child contracting COVID-19 at childcare/daycare/school  
My child bringing the virus into the household and infecting other people  
Public health measures negatively impacting my child's ability to learn (e.g., distancing, masking)  
Potential for my child's school to close due to COVID-19 outbreak  
Reopening of my workplace  
Physical distancing measures negatively impacting my child's ability to play and connect with friends  
Contracting the virus in my work setting  
The safety or effectiveness of COVID-19 vaccines  
The duration of protection provided by the vaccine(s)

## maru / matchbox

The safety of a COVID-19 vaccine for children under 12 years of age  
The effectiveness of a COVID-19 vaccine for children under 12 years of age  
My child being unvaccinated  
Worrying about COVID-19 becoming endemic (meaning it will continue to circulate among pockets of the population for years to come)  
Lost connections with family and friends  
Worrying about future lockdowns  
Worrying about the long term mental health impacts resulting from the stress of the pandemic  
Experiencing relationship challenges with my partner  
Being safe from physical or emotional domestic violence  
Fear of getting severely sick or dying  
Fear of a family member/loved one getting severely sick or dying  
Challenges in accessing what I need as a result of supply chain disruptions  
Worrying about the compounding effects of COVID-19 alongside the climate crisis  
Utilizing 911 or emergency response services for a mental health crisis

TAB NOTE:  
Detail Table Requirements

[QUESTION TYPE: single choice LAYOUT: default (kato)]

[QFOODSECURITY\_A] [REQUIRED]

Base: Total

You and other household members worried that food would run out before you got money to buy more. Was that often true, sometimes true, or never true in the last 12 months?

[ANSWERS] [ANCHOR]

Often true  
Sometimes true  
Never true  
Don't know/prefer not to answer

TAB NOTE:  
Detail Table Requirements

[QUESTION TYPE: multi choice LAYOUT: default (kato)]

[Q\_FOODSECURITY] [REQUIRED]

Base: Total

Since the onset of the COVID-19 pandemic and related restrictions in Canada, have you or any members of your household accessed food-based community programs to get food? (please select all that apply)

[ANSWERS] [RANDOMIZE]

Food Bank  
Soup Kitchens/Free Meal programs

## maru / matchbox

Meal or food programs from a school  
Community Kitchen program  
Community Garden  
Food voucher program (e.g., receiving gift cards for food from a charitable organization)  
Food delivered by a community program  
Asking friends or family for help with food  
Other **[ANCHOR]**  
No – I haven't accessed any food programs **[EXCLUSIVE] [ANCHOR]**

TAB NOTE:  
Detail Table Requirements

**[QUESTION TYPE:** single choice **LAYOUT:** default (kato)]  
**[Q\_OVERSTRESSCOPE] [REQUIRED]**  
**Base: Total**

Overall, how well do you think you are coping with stress related to the COVID-19 pandemic?

**[ANSWERS] [ANCHOR]**

Very well  
Fairly well  
Not very well  
Not well at all  
Don't know  
Prefer not to say  
Not applicable – I have not experienced any stress related to COVID-19

TAB NOTE:  
Detail Table Requirements

**[QUESTION TYPE:** multi choice **LAYOUT:** default (kato)]  
**[Q\_COPING1] [REQUIRED]**  
**Base: Total**

Which of the following have helped you to cope with stress related to the COVID-19 pandemic in the **past 2 weeks**? (Please select all that apply)

**[ANSWERS] [RANDOMIZE]**

Connecting with those in my household  
Connecting with my family or friends **virtually** (e.g., phone, video chat, etc.)  
Connecting in-person with friends or family  
Enjoying outdoor activities with friends or family  
Connecting with a mental health worker or counsellor **virtually** (e.g. via phone, video chat, etc.)  
Having a supportive employer  
Spending time with my pet(s)  
Receiving in-person mental health supports  
Accessing virtual mental health resources (e.g. online cognitive behavioural therapy, etc.)

## maru/matchbox

Maintaining a healthy lifestyle (e.g. balanced diet, enough sleep, exercise, etc.)  
Keeping up to date with relevant information (e.g. TV news, newspapers, online information, etc.)  
Limiting my exposure to the news about COVID-19  
Limiting exposure to social media (e.g. Facebook, Instagram, Snapchat, Twitter etc.)  
Increasing my use of social media (e.g. Facebook, Instagram, Snapchat, Twitter etc.)  
Contacting a support group (i.e., where members with the same issues can come together for sharing coping strategies, to feel more empowered and/or for a sense of community)  
Going for a walk/exercise outside  
Exercising indoors (e.g., gym, home)  
Doing a hobby  
Learning or doing something new  
Volunteering to help  
Accessing federal government benefits and supports (e.g., Employment Insurance, Canada Recovery Benefit, Canada Recovery Sickness Benefit, etc.)  
Accessing provincial government supports (e.g., emergency benefits for workers, rent freezes)  
Other **open** please specify **anchor**  
Don't know **[ANCHOR] [EXCLUSIVE]**  
Nothing has helped me to cope with my stress related to COVID-19 **[ANCHOR] [EXCLUSIVE]**  
Not applicable – I don't feel stressed **[ANCHOR] [EXCLUSIVE]**

TAB NOTE:  
Detail Table Requirements

**[QUESTION TYPE:** single choice **LAYOUT:** default (kato)]  
**[QVIRTUAL] [REQUIRED]**  
**Base: Total**

If you have experienced mental health challenges at any point during the pandemic, have you used virtual (online or phone-based) mental health services and supports (e.g., counselling, online cognitive behavioural therapy, mental health coaching sessions)?

**[ANSWERS] [ANCHOR]**  
Yes  
No  
Not applicable. I haven't experienced a mental health challenge during the pandemic  
Prefer not to say

TAB NOTE:  
Detail Table Requirements

**[ASK QVIRTUAL 2, IF NO IN QVIRTUAL]**  
**[QUESTION TYPE:** multi choice **LAYOUT:** default (kato)]  
**[QVIRTUAL2] [REQUIRED]**  
**Base: If No (Code 2) in QVirtual**

Virtual mental health supports are receiving substantial investment to help people cope with mental health challenges during the pandemic. In order to inform better programs, could you please indicate why you did not access virtual mental health supports. (Select all that apply)

**[ANSWERS] [RANDOMIZE]**

- Stigma (I was afraid of what others would think of me)
- Didn't feel I needed help
- Privacy concerns
- I don't think they would be helpful
- I didn't know these supports were available
- Necessary equipment not available (e.g., computer, smart phone)
- Connectivity issues (e.g., no/slow internet connection)
- Competing demands on my time
- I prefer in-person health care supports
- Other (Please specify) **[ANCHOR]**

**TAB NOTE:**

[Detail Table Requirements](#)

**[QUESTION TYPE:** single choice grid **LAYOUT:** default (kato)]

**[QVIRTUAL3] [REQUIRED]**

**Base: Total**

Are you aware of any of the following virtual mental health supports in Canada?

**[COLUMNS] [ANCHOR]**

- Yes
- No
- Don't know /Not applicable/ Prefer not to say

**[ROWS] [RANDOMIZE]**

- BounceBack
- Wellness Together Canada
- Strongest Families
- WellCan
- MindBeacon
- Other **[ANCHOR]**

**TAB NOTE:**

[Detail Table Requirements](#)

**[QUESTION TYPE:** single choice **LAYOUT:** default (kato)]

**[QHelp] [REQUIRED]**

**Base: Total**

Since the start of the COVID pandemic, was there ever a time when you felt that you needed help for problems with your emotions, mental health or use of alcohol or drugs, but you didn't receive it?



[ANSWERS] [ANCHOR]

Yes  
No

TAB NOTE:  
Detail Table Requirements

[QUESTION TYPE: multi choice LAYOUT: default (kato)]

[QHelp\_1] [REQUIRED]

Base: Those who selected 'Yes' in QHelp

Why didn't you receive the help you needed (during the past 12 months)? (Select all that apply)

[ANSWERS] [ANCHOR]

You preferred to manage yourself  
You didn't know how or where to get this kind of help  
You haven't gotten around to it (e.g., too busy)  
Your job interfered (e.g., workload, hours of work or no cooperation from supervisor)  
Access to care was limited (e.g., help was not readily available)  
You didn't have confidence in the health care system or social services  
You couldn't afford to pay  
Insurance did not cover  
You were afraid of what others would think of you  
Language problems  
Talked to friends or family instead  
Hoped your mental health would get better by itself  
Other [ANCHOR]

TAB NOTE:  
Detail Table Requirements

[QUESTION TYPE: multi choice grid LAYOUT: default (kato)]

[Q\_COPING2] [REQUIRED]

Base: Total

Please indicate how your use of any of the following has been impacted by the COVID-19 pandemic? (Please select one option on each row)

[COLUMNS] [ANCHOR]

More  
Less  
No change  
Not applicable  
Prefer not to say

[ROWS] [RANDOMIZE]

## maru/matchbox

Drinking alcohol  
Use of tobacco products (e.g. cigarettes, cigars, chewing tobacco, vaping, etc.)  
Use of cannabis products  
Use of prescribed medication  
Use of other psychoactive substances (e.g., cocaine, heroin)  
Gambling  
Eating/Food consumption  
Screen time  
Compulsive online shopping (e.g. buying things you don't really need)

TAB NOTE:  
Detail Table Requirements

[QUESTION TYPE: single choice LAYOUT: default (kato)]  
[QCOPING3] [REQUIRED]  
Base: Total

Has your use of substances increased as a way to cope at any point during the pandemic?

[ANSWERS] [ANCHOR]

Yes  
No  
Prefer not to say

TAB NOTE:  
Detail Table Requirements

[QUESTION TYPE: single choice LAYOUT: default (kato)]  
[QUS\_AuditC\_1] [REQUIRED]  
Base: Total

Think about your drinking in the past year. A drink means one beer, one small glass of wine (5oz) or one mixed drink containing one shot (1.5oz) of spirits.

How often do you have a drink containing alcohol?

[ANSWERS] [ANCHOR]

Never  
Less than Monthly  
Monthly  
Weekly  
2-3 times a Week  
4-6 times a Week  
Daily

TAB NOTE:

## Detail Table Requirements

[QUESTION TYPE: single choice LAYOUT: default (kato)]

[QUS\_AuditC\_2] [REQUIRED]

Base: Total

How many drinks containing alcohol do you have on a typical day you are drinking?

[ANSWERS] [ANCHOR]

- 1 Drink
- 2 Drinks
- 3 Drinks
- 4 Drinks
- 5-6 Drinks
- 7- 9 Drinks
- 10 or more drinks

TAB NOTE:

Detail Table Requirements

[QUESTION TYPE: single choice LAYOUT: default (kato)]

[QUS\_AuditC\_3] [REQUIRED]

Base: Total

How often do you have X (5 for men; 4 for women and men over age 65) or more drinks on one occasion?

[ANSWERS] [ANCHOR]

- Never
- Less than Monthly
- Monthly
- Weekly
- 2-3 times a Week
- 4-6 times a Week
- Daily

TAB NOTE:

Detail Table Requirements

## SECTION 3: Self-harm section

[QUESTION TYPE: text instruction]

[Q\_S3INSTRUCTION] [REQUIRED]

Base: Total

The following questions are on the topic of self-harm and suicidal thoughts. We understand this can be a sensitive topic, so please remember that your answers are anonymous. If you are in crisis, please call 1-833-456-4566 toll

**[QUESTION TYPE:** single choice grid **LAYOUT:** default (kato)]

**[Q\_selfharm1] [REQUIRED]**

**Base: Total**

Have you done or experienced any of the following, as a result of the COVID-19 pandemic in the **past 2 weeks**?  
(Please select one option on each row)

**[COLUMNS] [ANCHOR]**

Yes

No

Prefer not to say

**[ROWS] [RANDOMIZE]**

Experienced suicidal thoughts/feelings

Deliberately hurt myself

**TAB NOTE:**

Detail Table Requirements

**[ONLY SHOW IF SELECTED 'YES TO ANY RESPONSE IN Q SELFHARM1]**

**[QUESTION TYPE:** single choice grid **LAYOUT:** default (kato)]

**[Q\_selfharm2] [REQUIRED]**

**Base: IF YES TO ANY ABOVE**

How often have you experienced or done each of the following as a result of the COVID-19 pandemic in the **past 2 weeks**? (Please select one option on each row)

**[COLUMNS] [ANCHOR]**

Once a day or more often

Nearly everyday day

A few times a week

Passing thoughts

Don't know

Prefer not to say

**[ROWS] [ANCHOR]**

Experienced suicidal thoughts/feelings

Deliberately hurt myself

**TAB NOTE:**

Detail Table Requirements

**SECTION 4: DEMOGRAPHICS**

## maru/matchbox

**[QUESTION TYPE:** single choice **LAYOUT:** default (kato)]

**[QSEX] [REQUIRED]**

**Base: Total**

What sex were you assigned at birth?

**[ANSWERS] [ANCHOR]**

Male

Female

**TAB NOTE:**

[Detail Table Requirements](#)

**[QUESTION TYPE:** single choice **LAYOUT:** default (kato)]

**[Q\_GENDER] [REQUIRED]**

**Base: Total**

We know that gender has important consequences for health and how we are treated by different individuals and institutions. Which gender do you most identify with?

**[ANSWERS] [ANCHOR]**

Woman

Man

Non-binary

Two-Spirit

Not listed

Prefer not to answer

**TAB NOTE:**

[Detail Table Requirements](#)

**[QUESTION TYPE:** multi choice **LAYOUT:** default (kato)]

**[Q\_ETHNICITY] [REQUIRED]**

**Base: Total**

What is your ethnic origin? Ethnic origin refers to the ethnic or cultural origins of your ancestors (who are usually more distant than a grandparent) (Check all that apply)

**[ANSWERS] [RANDOMIZE]**

Indigenous origins (for example, First Nations, Inuit, Métis)

East Asian origins (for example, Chinese, Japanese, Korean)

South Asian origins (for example, Indian, Punjabi, Pakistani)

Southeast Asian origins (for example, Filipino, Thai, Vietnamese)

Latin American origins (for example, Brazilian, Cuban, Bolivian)

European origins (for example, British, German, Russian)

## maru / matchbox

Middle Eastern origins (for example, Iranian, Iraqi, Afghan)  
African origins (for example, Nigerian, Ghanaian, Zimbabwean)  
Other (please specify) \_\_\_\_\_ [ANCHOR]  
Don't know [EXCLUSIVE] [ANCHOR]  
Prefer not to answer [EXCLUSIVE] [ANCHOR]

TAB NOTE:  
[Detail Table Requirements](#)

[QUESTION TYPE: multi choice LAYOUT: default (kato)]  
[QRACE] [REQUIRED]  
Base: Total

We know that people of different races do not have significantly different genetics. But our race still has important consequences, including how we are treated by different individuals and institutions. Which race category best describes you? Check all that apply:

[ANSWERS] [ANCHOR]  
Black (African, Afro-Caribbean, African Canadian descent)  
East Asian (Chinese, Korean, Japanese, Taiwanese descent)  
Southeast Asian (Vietnamese, Cambodian, Thai, Filipino, Indonesian, other Southeast Asian descent)  
Indigenous (First Nations, Métis, Inuk/Inuit descent)  
Latino (Latin American, Hispanic descent)  
Middle Eastern (Arab, Persian, West Asian descent (e.g. Afghan, Egyptian, Iranian, Lebanese, Turkish, Kurdish))  
South Asian (East Indian, Pakistani, Bangladeshi, Sri Lankan, Indo-Caribbean descent)  
White (European descent)  
Another race category (Includes values not described above)  
Do not know  
Prefer not to answer

TAB NOTE:  
[Detail Table Requirements](#)

[QUESTION TYPE: single choice LAYOUT: default (kato)]  
[Q\_SEXUALITY] [REQUIRED]  
Base: Total

Do you identify as being LGBTQ+ (lesbian, gay, bisexual, trans, Two-Spirit, queer, etc.)?

[ANSWERS] [ANCHOR]  
Yes  
No  
Unsure  
Prefer not to answer

TAB NOTE:

# maru/matchbox

## Detail Table Requirements

**[QUESTION TYPE:** single choice **LAYOUT:** default (kato)]

**[Q\_DISABILITY] [REQUIRED]**

**Base: Total**

Do you identify as a person with a disability?

**[ANSWERS] [ANCHOR]**

Yes

No

Prefer not to answer

**TAB NOTE:**

Detail Table Requirements

**[QUESTION TYPE:** single choice **LAYOUT:** default (kato)]

**[QMentalHealth\_Pre] [REQUIRED]**

**Base: Total**

Do you identify as a person who has a pre-existing (prior to COVID-19) mental health condition?

**[ANSWERS] [ANCHOR]**

Yes

No

Prefer not to answer

**[QUESTION TYPE:** multi choice **LAYOUT:** default (kato)]

**[QMentalHealth\_subtype] [REQUIRED]**

**BASE: answered yes to QMentalHealth\_Pre**

The COVID-19 pandemic is impacting people with mental health conditions in various ways. To help us gain a better understanding of this, please identify the mental health condition that you experience (check all that apply).

**[ANSWERS] [ANCHOR]**

Mood disorder (e.g., depression, bipolar disorder)

Anxiety disorder

Personality disorder

Psychotic disorder (e.g., schizophrenia)

Eating disorder

Trauma-related disorder (e.g., post-traumatic stress disorder)

Substance use disorder

Other **[ANCHOR]**

Prefer not to answer **[Exclusive]** **[Anchor]**

TAB NOTE:

[Detail Table Requirements](#)

**[QUESTION TYPE:** single choice **LAYOUT:** default (kato)]

**[Q\_CITIZENSHIP]** **[REQUIRED]**

**Base: Total**

Which of the following best describes your Canadian citizenship status?

**[ANSWERS]** **[ANCHOR]**

Canadian citizen by birth

Canadian citizen by naturalization

Landed immigrant/Permanent resident

Refugee

Not a citizen

Prefer not to say

TAB NOTE:

[Detail Table Requirements](#)

**[QUESTION TYPE:** single choice **LAYOUT:** default (kato)]

**[Q\_VACCINATION]** **[REQUIRED]**

**Base: Total**

We are keen to hear from people who are both vaccinated and unvaccinated as some research indicates that mental health outcomes differ by vaccine status. Are you considered fully vaccinated against COVID-19 (i.e., received the full series of an accepted (endorsed by the World Health Organization) COVID-19 vaccine or a full series of a combination of accepted vaccines at least 14 full days prior to completing this survey).

**[ANSWERS]** **[ANCHOR]**

Yes

No

Prefer not to answer

**[QUESTION TYPE:** single choice **LAYOUT:** default (kato)]

**[Q\_PARENT2]** **[REQUIRED]**

**Base: Total**

How many children (under 18 years of age) reside in your household?

**[ANSWERS]** **[ANCHOR]**

0

1

2

3+



# maru/matchbox

TAB NOTE:  
Detail Table Requirements

**[QUESTION TYPE:** single choice **LAYOUT:** default (kato)]  
**[Q\_ParentGuardianStatus]** [REQUIRED]  
**Base: Total**

Which of the following best describes your parental/guardian status?

**[ANSWERS]** [ANCHOR]

Not a parent / guardian  
Parent / guardian (to a child of any age)  
Prefer not to say

TAB NOTE:  
Detail Table Requirements

**[QUESTION TYPE:** multi choice **LAYOUT:** default (kato)]  
**[Q\_CHILDAGE]** [REQUIRED]  
**Base: if yes at Q\_ParentGuardianStatus**

What age group is/are your child(ren)? (Please select all that apply)

**[ANSWERS]** [ANCHOR]

4 years and under  
5-11 years  
12-17 years  
18 years and over

TAB NOTE:  
Detail Table Requirements

**[QUESTION TYPE:** single choice **LAYOUT:** default (kato)]  
**[QPARENT3]** [REQUIRED]  
**Base: Total**

Are you a single parent?

**[ANSWERS]** [ANCHOR]

Yes  
No  
Prefer not to say

TAB NOTE:  
Detail Table Requirements

**[QUESTION TYPE:** multi choice **LAYOUT:** default (kato)]  
**[QSCHOOL]** [REQUIRED]  
**Base: if yes at Q\_ParentGuardianStatus**

Which of the following best describes the childcare/daycare or school situation of your child/children?

**[ANSWERS] [ANCHOR]**

- One (or more) of my child/ren is attending childcare/daycare
- One (or more) of my child/ren is attending school
- One (or more) of my child/ren are at home due to concerns about the COVID-19 pandemic
- One (or more) of my children is homeschooled due to the COVID-19 pandemic
- One (or more) of children is homeschooled independent of the COVID-19 pandemic
- Other **[ANCHOR]**
- Prefer not to say **[EXCLUSIVE] [ANCHOR]**

**TAB NOTE:**

[Detail Table Requirements](#)

**[QUESTION TYPE:** single choice **LAYOUT:** default (kato)]

**[Q\_CHILDMENTALHEALTH] [REQUIRED]**

**Base: if yes at Q\_ParentGuardianStatus**

Compared to before the COVID-19 pandemic and related restrictions in Canada, how would you say the mental health of your child(ren) is now?

**[ANSWERS] [ANCHOR]**

- Significantly better now
- Slightly better now
- About the same
- Slightly worse now
- Significantly worse now
- It is affecting my children differently (some feel better/some feel worse)
- Prefer not to answer

**[QUESTION TYPE:** single choice grid **LAYOUT:** default (kato)]

**[Q\_CHILDRENMENTALHEALTH\_BriefSCAS] [REQUIRED] [STRAIGHTLINE CHECK: NO]**

**Base: Total**

Below is a list of items that describe children. For each item please circle the response that best describes your child. Please answer all the items. There is no set time period over which the judgement has to be made.

**[COLUMNS] [ANCHOR]**

- Never
- Sometimes
- Often
- Always

**[ROWS] [ANCHOR]**

My child worries that something bad will happen to him/her

## maru / matchbox

My child complains of feeling afraid  
All of a sudden my child feels really scared for no reason at all  
My child worries about being away from us / me  
My child worries what other people think of him/her  
My child has trouble going to school in the mornings because (s)he feels nervous or afraid  
My child feels afraid that (s)he will make a fool of him/herself in front of people  
My child worries about things

TAB NOTE:  
Detail Table Requirements

[QUESTION TYPE: multi choice LAYOUT: default (kato)]  
[Q\_ChildCopingStrategies] [REQUIRED]  
Base: if yes at Q\_ParentGuardianStatus

Which do you think has helped your child(ren) cope with stress related to COVID-19 pandemic in the **past 2 weeks**? (Please select all that apply)

### [ANSWERS] [RANDOMIZE]

Connecting with family who live outside our home **virtually** (e.g. phone, video chat, text etc.)  
Connecting with friends **virtually** (e.g. phone, video chat, text etc.)  
Contacting a **school or community-based** mental health worker or counsellor **virtually** (e.g. via phone, video chat, etc.)  
Receiving **in-person** mental health supports  
Accessing virtual mental health resources through medical professionals (e.g. online cognitive behavioural therapy, etc.)  
Accessing virtual educational or self-help mental health resources through websites, apps, or phone (e.g., Headspace, KidsHelpPhone)  
Participating in a virtual child/youth support group  
Maintaining a healthy lifestyle (e.g. balanced diet, enough sleep, exercise, etc.)  
Maintaining family routines (e.g., family meals, bedtime routines)  
Keeping up to date with relevant information (e.g. TV news, newspapers, online information, etc.)  
Limiting their exposure to the news about COVID-19  
Limiting their exposure to social media (e.g. Facebook, Instagram, Snapchat, Twitter etc.)  
More time for social media use (e.g. Facebook, Instagram, Snapchat, Twitter etc.)  
Going for a walk/exercise outside  
Exercising in our home  
Spending time with pet(s)  
Playing outdoors  
Playing inside (e.g., games, toys, telling stories)  
Doing a hobby (e.g., music, reading, arts & crafts)  
Volunteering to help  
Connecting **in person** with friends  
Connecting **in person** with teachers/childcare providers  
Connecting **in person** with friends outside of school/childcare  
Other (please specify) [ANCHOR]

# maru / matchbox

Don't know [ANCHOR] [EXCLUSIVE]

Not applicable [ANCHOR] [EXCLUSIVE]

Nothing has helped my child(ren) to cope with stress related to COVID-19 [ANCHOR] [EXCLUSIVE]

TAB NOTE:

[Detail Table Requirements](#)

[QUESTION TYPE: single choice grid LAYOUT: default (kato)]

[Q\_PARENT\_CHILD\_INTERACTIONS] [REQUIRED]

Base: if yes at Q\_ParentGuardianStatus

Please indicate how your interactions with your child(ren) have been impacted by the COVID-19 pandemic.  
(Please select one option on each row)

Commented [HZ1]:

[COLUMNS] [ANCHOR]

More

Less

No change

Not applicable

Prefer not to say

[ROWS] [RANDOMIZE]

Having quality time with my child(ren)

Feeling closeness with my child(ren)

Showing love or affection to my child(ren)

Observing resilience (strength and perseverance) in my child(ren)

Disciplining my child(ren)

Conflicts with my child(ren)

Using harsh words with my child(ren)

Yelling/shouting at my child(ren)

TAB NOTE:

[Detail Table Requirements](#)

[QUESTION TYPE: single choice LAYOUT: default (kato)]

[Q\_CHILDVACCINE\_OVER12] [REQUIRED]

Base: If 'Yes' at Q\_ParentGuardianStatus

If you have a child(ren) age 12 to 18, have they been vaccinated?

[ANSWERS] [ANCHOR]

Yes

No

Prefer not to answer

Does not apply

TAB NOTE:

[Detail Table Requirements](#)

**[QUESTION TYPE:** single choice **LAYOUT:** default (kato)]

**[Q\_CHILDVACCINE\_UNDER12] [REQUIRED]**

**Base: if yes at Q\_ParentGuardianStatus**

If you have a child(ren) under the age of 12, will you get them vaccinated?

**[ANSWERS] [ANCHOR]**

- Yes
- No
- Have not yet decided
- Prefer not to answer
- Does not apply

**TAB NOTE:**

[Detail Table Requirements](#)

**[QUESTION TYPE:** multi choice **LAYOUT:** default (kato)]

**[Q\_CHILDVACCINEBARRIERS] [REQUIRED]**

**Base: if yes at Q\_ParentGuardianStatus**

Are any of the following barriers to your child(ren) being vaccinated?

**[ANSWERS] [ANCHOR]**

- Not confident in the safety of a vaccine for my child(ren)
- Concern about risks and side effects for my child(ren)
- Will wait until it feels safe to get a vaccine for my child(ren)
- Do not consider it necessary for my child(ren) to get a vaccination
- Do not believe in vaccination for my child(ren)
- Have not yet decided
- Other reason
- My child(ren) have a pre-existing medical condition
- My child(ren) have already had or I think they have had COVID-19
- My child is hesitant about getting the vaccine

**TAB NOTE:**

[Detail Table Requirements](#)

**[QUESTION TYPE:** open end **LAYOUT:** text field (single line) narrowtextbox - numeric (kato)]

**[QHOUSEHOLD] [REQUIRED]**

**Base: Total**

How many people reside in your household?

**[RANGE: 1 TO 99]**

TAB NOTE:  
Detail Table Requirements

[QUESTION TYPE: multi choice LAYOUT: default (kato)]  
[Q\_HOUSEHOLDLIVING] [REQUIRED]  
Base: Total

Which of the following best describes your living arrangements? (Please select all that apply)

[ANSWERS] [ANCHOR]

- I live alone
- Living with a spouse or partner
- Living with friend(s) or housemate(s)
- Living with siblings
- Living with my child(ren) who are over 18
- Living with my child(ren) who are under 18
- Living with other adult family members (e.g., parents, grandparents)
- Living with grandchildren
- Other
- Prefer not to answer [EXCLUSIVE]
- None of the above [EXCLUSIVE]

TAB NOTE:  
Detail Table Requirements

[QUESTION TYPE: text instruction]  
[Q\_FINAL] [REQUIRED]  
Base: Total

Thank you for taking part in this survey. If you've been affected by this topic and would like any more information, need advice, or support, you can go to the following place for help:  
Canadian Mental Health Association

Please click forward to complete the survey...

**PLEASE ADD THE FOLLOWING RE-DIRECT LINK AT THE END OF SURVEY TO "<https://cmha.ca/>"**

**MVC Sample Demos to Append:**

- Gender
- Age
- Province
- Urban/Rural
- HHI
- Education
- Household Size (HH Size)
- Community Size (PPO\_CNTR\_POP\_SIZE\_GROUP)
- QWave Variable (Wave 1, Wave 2, Wave 3 and Wave 4)
