# Supplementary material for: Food-related worry and food bank use during the COVID-19 pandemic in Canada: results from a nationally representative multi-round study
Source: BMC Public Health. 2023 Sep 5;23:1723. doi: 10.1186/s12889-023-16602-x (PMC10478349; doi:10.1186/s12889-023-16602-x)
Supplement: Supplementary file 2 — Additional file 2. [file 12889_2023_16602_MOESM2_ESM.xlsx]

## Sheet: Sheet1
Supplementary Table 1: Use of community-based food resources since the start of the COVID-19 pandemic as reported in rounds 1, 2, and 3
	Round 1 (N = 3000)		Round 2 (N = 3027)		Round 3 (N = 3034)
	May 2020		September 2020		January 2021
	n	%	n	%	n	%
I haven't accessed any food programs	2827	0.942	2681	0.886	2805	0.925
Food Bank	63	0.021	99	0.033	84	0.028
Asking friends and family for help with food*	---	---	134	0.044	78	0.026
Food delivered by a community program	58	0.019	76	0.025	45	0.015
Community Garden	22	0.007	56	0.019	22	0.007
Community Kitchen program	22	0.007	56	0.019	22	0.007
Food voucher program (e.g., receiving gift cards for food from a charitable organization)	30	0.01	87	0.029	36	0.012
Soup Kitchens/Free Meal programs	28	0.009	73	0.024	41	0.014
Meal or food programs from a school	22	0.007	59	0.019	27	0.009
Other	12	0.004	16	0.005	12	0.004
*Not asked in Round 1
